# Supplementary material for: The Prostate Cancer Androgen Receptor Cistrome in African American Men Associates with Upregulation of Lipid Metabolism and Immune Response
Source: Oxford University Press journal article supplement (doi:10.1158/0008-5472.can-21-3552), 2022-06-22
Supplement: can-21-3552_supplementary_figures_suppsf1.docx [file can-21-3552_supplementary_figures_suppsf1.docx]

**Supplementary Figure 1.** Inferred genetic ancestry using common polymorphisms called from off-target and on-target sequencing reads from AR ChIP-seq data.


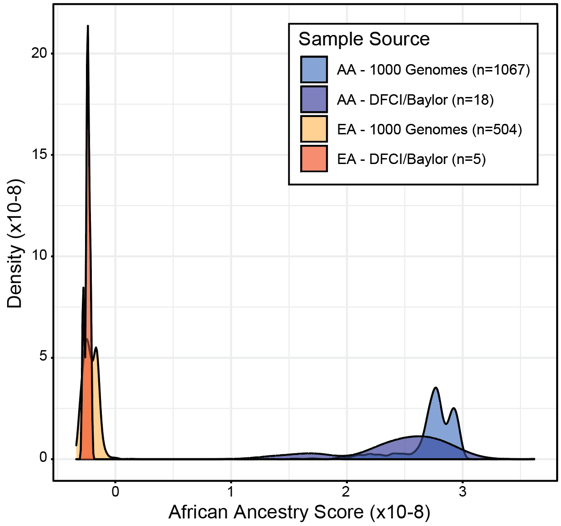


Histogram shows the African ancestry score for the prostate samples included in this analysis as well as samples from 1000 Genomes Project for reference.
